# Supplementary material for: A highly stretchable strain sensor based on a graphene/silver nanoparticle synergic conductive network and a sandwich structure
Source: Royal Society of Chemistry journal article supplement (doi:10.1039/c6tc00300a), 2016-01-01
Supplement: c6tc00300a1.pdf [file c6tc00300a1.pdf]

## Supplementary Information

### Highly Stretchable Strain Sensors Based on Graphene/Silver Nanoparticles Synergic Conductive Networks and Sandwich Structure

Song Chen, Yong Wei, Xue Yuan, Yong lin, Lan Liu\*

College of Materials Science and Engineering, Key Lab of Guangdong Province for  
High Property and Functional Macromolecular Materials, South China University of  
Technology, Guangzhou 510640, P. R. China

\* **Corresponding author:** Lan Liu

**E-mail:** [psliulan@scut.edu.cn](mailto:psliulan@scut.edu.cn).

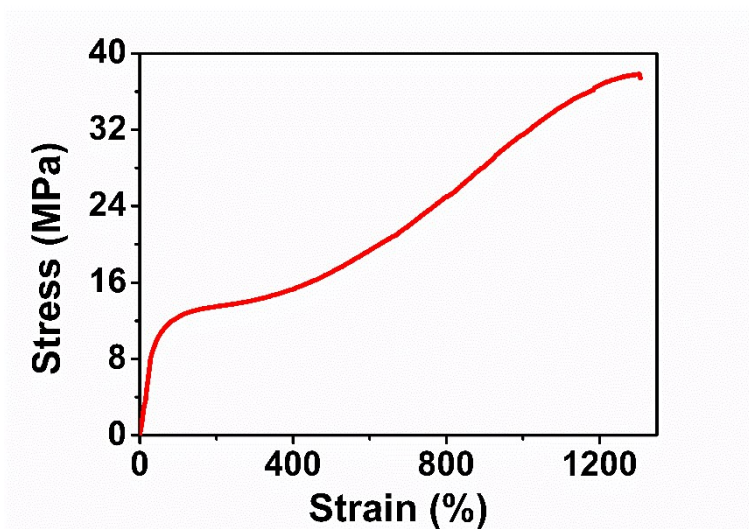

**Fig. S1** Stress-strain curve of TPU at room temperature.

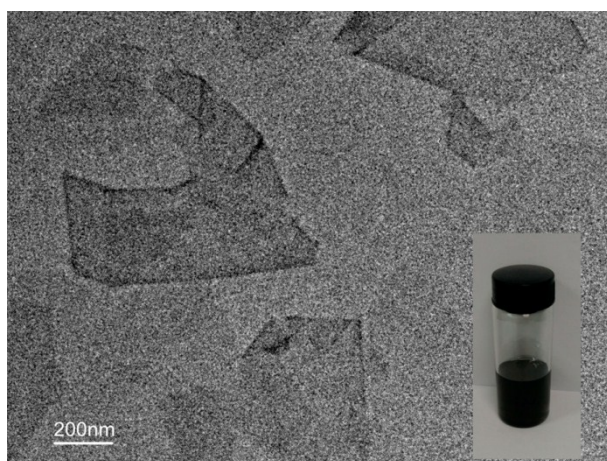

**Fig. S2** TEM images of graphene. Inset is the digital photograph of graphene NMP suspension.

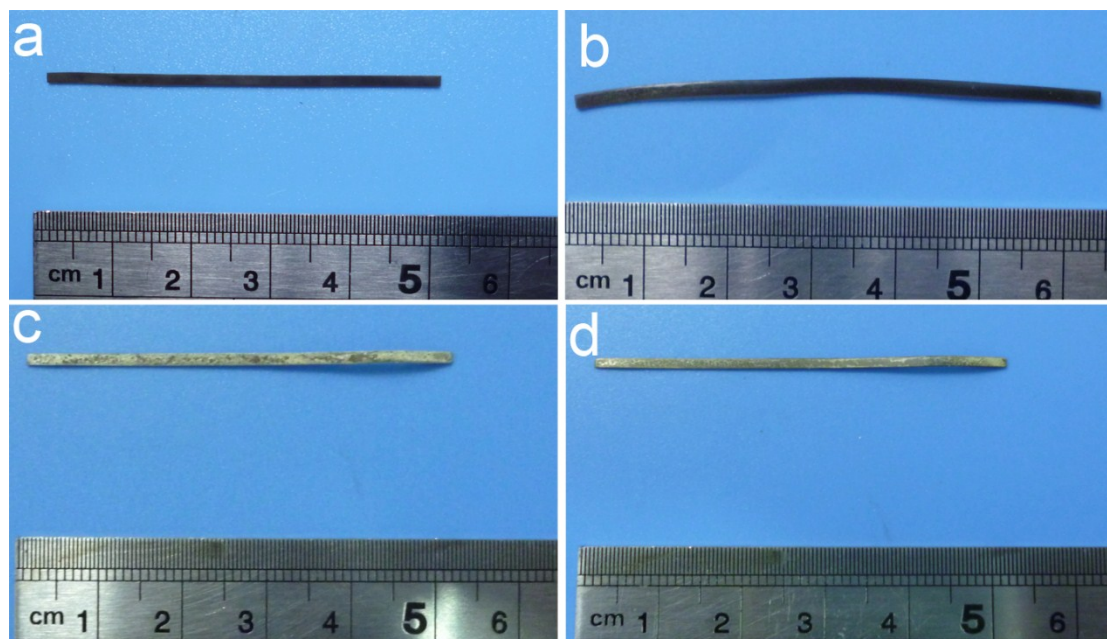

**Fig. S3** (a, b) Digital photograph of 1wt% GE/TPU strip before (a) and after (b) swelling in toluene. (c, d) Digital photograph of 1 wt% graphene embedded GE/AgNPs/TPU strip before (c) and after (d) moving AgNPs on surface by a 3M tape.

| Reference        | Filler type                     | Matrix                                    | Max strain(%) | Gauge factor |
|------------------|---------------------------------|-------------------------------------------|---------------|--------------|
| 1                | SWCNT                           | PDMS                                      | 280           | 0.82         |
| 2                | Graphene woven fabric           | PDMS                                      | 10            | 1000         |
| 3                | CNT                             | PDMS                                      | 150           | 0.004        |
| 4                | Pt-coated polymeric nanofibres  | Ultraviolet-curable polyurethane acrylate | 5             | 11.45        |
| 5                | Graphene–polyvinylidene fluorid | PVDF                                      | 1.5           | N/A          |
| 6                | CNT Yarn                        | N/A                                       | 0.04          | 0.5          |
| 7                | MWCNT forrest                   | Polyurethane                              | 275           | 1.07         |
| 8                | MWCNT                           | Polyurethane                              | 403           | 4            |
| 9                | Silver nanoparticles            | SBS                                       | 16            | 19           |
| 10               | CNT                             | PDMS                                      | 300           | 1            |
| 11               | Functionalized MWNTs            | TPU                                       | 200           | 140238       |
| 12               | Graphene/Nanocellulose          | PDMS                                      | 100           | 7.1          |
| 13               | AgNWs                           | PDMS/ Ecoflex                             | 50            | 1            |
| 14               | Graphene woven fabrics          | PDMS                                      | 6             | 1000         |
| 15               | Reduced graphene oxide          | PET                                       | 3             | 9.49         |
| 16               | carbon black particles          | Ecoflex                                   | 100           | 3.8          |
| 17               | AgNWs                           | PDMS                                      | 70            | 14           |
| 18               | graphene                        | Natural rubber                            | 800           | 35           |
| 19               | MWNTs                           | PDMS                                      | 120           | 9617         |
| 20               | CNT fibers                      | Ecoflex                                   | 960           | 64           |
| 21               | CNT                             | Ecoflex                                   | 500           | 2.4          |
| 22               | Graphene woven fabrics          | PDMS                                      | 200           | 35           |
| 23               | CNT                             | Gum/PDMS                                  | 530           | 25           |
| 24               | GaInSn                          | PDMS                                      | 60            | 2            |
| 25               | GE/ nylon covered rubber        | PDMS                                      | 150           | 1.4          |
| 26               | Carbonized patterns             | PDMS                                      | 100           | 20000        |
| 27               | N/A                             | PU/PEDOT:PSS                              | 160           | 1            |
| 28               | RGO                             | Human hairs                               | 30            | 4.46         |
| 29               | Graphite                        | Paper                                     | 0.6           | 536.6        |
| 30               | CNT                             | Natural rubber                            | 100           | 43.5         |
| <b>This work</b> | <b>GE/AgNPs</b>                 | <b>PU</b>                                 | <b>1000</b>   | <b>467.5</b> |

Table S1 Selected parameters extracted from papers on composite strain sensors

1. T. Yamada, Y. Hayamizu, Y. Yamamoto, Y. Yomogida, A. Izadi-Najafabadi, D. N. Futaba and K. Hata, *Nat Nanotechnol.*, 2011, **6**, 296–301.
2. X. Li, R. Zhang, W. Yu, K. Wang, J. Wei, D. Wu, A. Cao, Z. Li, Y. Cheng, Q. Zheng, R. S. Ruoff and H. Zhu, *Sci. rep.*, 2012, **2**, 870.
3. D. J. Lipomi, M. Vosgueritchian, B. C-K. Tee, S. L. Hellstrom, J. A. Lee, C. H. Fox and Z. Bao, *Nat. Nanotechnol.*, 2011, **6**, 788–792.
4. C. Pang, G. Lee, T. Kim, S. Kim, H. Kim, S. Ahn and K. Suh, *Nat. Mater.*, 2012, **11**, 795–801.
5. V. Eswaraiyah, K. Balasubramaniam and S. Ramaprabhu, *J. Mater. Chem.*, 2011, **21**, 12626–12628.
6. H. Zhao, Y. Zhang, P. D Bradford, Q. Zhou, Q. Jia, F. Yuan and Y. Zhu, *Nanotechnology*, 2010, **21**, 305502.
7. B. Shin, J. Oh, M. Lima, M. E. Kozlov, S. Kim, and R. H. Baughman, *Adv. Mater.*, 2010, **22**, 2663–2667.
8. P. Slobodian, P. Riha, P. Saha, *CARBON*, 2012, **50**, 3446–3453.
9. M. Park, J. Im, M. Shin, Y. Min, J. Park, H. Cho, S. Park, M. Shim, S. Jeon, D. Chung, J. Bae, J. Park, U. Jeong and K. Kim, *Nat. Nano.*, 2012, **7**, 803–809.
10. L. Cai, L. Song, P. Luan, Q. Zhang, N. Zhang, Q. Gao, D. Zhao, X. Zhang, M. Tu, F. Yang, W. Zhou, Q. Fan, J. Luo, W. Zhou, P. M. Ajayan and S. Xie, *Sci. rep.*, 2013, **3**, 3048.
11. L. Lin, S. Liu, Q. Zhang, X. Li, M. Ji, H. Deng and Q. Fu, *ACS Appl. Mater. Interfaces*, 2013, **5**, 5815–5824.

12. Ch. Yan, J. Wang, W. Kang, M. Cui, X. Wang, C. Foo, K. J. Chee and P. Lee, *Adv. Mater.*, 2014, **26**, 2022–2027.
13. S. Yao and Y. Zhu, *Nanoscale*, 2014, **6**, 2345–2352.
14. Y. Wang, L. Wang, T. Yang, X. Li, X. Zang, M. Zhu, K. Wang, D. Wu and H. Zhu, *Adv. Funct. Mater.*, 2014, **24**, 4666–4670.
15. H. Tian, Y. Shu, Y. Cui, W. Mi, Y. Yang, D. Xie and T. Ren, *Nanoscale*, 2014, **6**, 699–705.
16. J. T. Muth, D. M. Vogt, R. L. Truby, Y. Mengüç, D. B. Kolesky, R. J. Wood and J. A. Lewis, *Adv. Mater.*, 2014, **26**, 6307–6312.
17. M. Amjadi, A. Pichitpajongkit, S. Lee, S. Ryu, and I. Park, *ACS Nano*, 2014, **8**, 5154–5163.
18. C. S. Boland, U. Khan, C. Backes, A. O’Neill, J. McCauley, S. Duane, R. Shanker, Y. Liu, I. Jurewicz, A. B. Dalton and J. N. Coleman, *ACS Nano*, 2014, **8**, 8819–8830.
19. J. Park, Y. Lee, J. Hong, Y. Lee, M. Ha, Y. Jung, H. Lim, S. Kim and H. Ko, *ACS Nano*, 2014, **8**, 12020–12029.
20. S. Ryu, P. Lee, J. B. Chou, R. Xu, R. Zhao, A. Hart and S. Kim, *ACS Nano*, 2015, **9**, 5929–5936.
21. M. Amjadi, Y. Yoon and I. Park, *Nanotechnology*, 2015, **26**, 375501.
22. Y. Cheng, R. Wang, J. Sun and L. Gao, *Adv. Mater.*, 2015, **27**, 7365–7371.
23. M. Darabi, A. Khosrozadeh, Q. Wang and M. Xing, *ACS Appl. Mater. Interfaces*, 2015, **7**, 26195–26205.
24. R. Matsuzaki and K. Tabayashi, *Adv. Funct. Mater.*, 2015, **25**, 3806–3813.
25. J. Park, W. Hyun, S. Mun, Y. Park and O. Park, *ACS Appl. Mater. Interfaces*, 2015, **7**, 6317–6324.

26. R. Rahimi, M. Ochoa, W. Yu and B. Ziaie, *ACS Appl. Mater. Interfaces*, 2015, **7**, 4463–4470.
27. S. Seyedin, J. M. Razal, P. C. Innis, A. Jeiranikhameneh, S. Beirne, and G. G. Wallace, *ACS Appl. Mater. Interfaces*, 2015, **7**, 21150-1158.
28. W. Yuan, Q. Zhou, Y. Li and G. Shi, *Nanoscale*, 2015, **7**, 16361-16365.
29. X. Liao, Q. Liao, X. Yan, Q. Liang, H. Si, M. Li, H. Wu, S. Cao and Y. Zhang, *Adv. Funct. Mater.*, 2015, **25**, 2395-401.
30. S. Wang, X. Zhang, X. Wu and C. Lu, *Soft Matter*, 2016, **12**, 845-52.
